# Supplementary material
Source: Research Square preprint supplement (doi:10.21203/rs.3.rs-9645309/v1)
Supplement: Supplementary file 1 [file c880e6e79551e1ac891c8bbb.xlsx]

## Sheet: Description
Supplementary material Data
This part of the supplementary material provides the data applied for (i) the lbSN House and (ii) the Canteclaer dwelling.
Addditonal general data that is applied to include pakcaging, storage etc. is also added.

## Sheet: Canteclaer
	Material	Deconstruction						Construction		Cleaning
		ML	Energy	Water	Diesel	Saw. blade	Time	ML	Extra time	ML	Energy	Water	Time
		[%]	[kWh/FU]	[l/FU]	[kWh/FU]	[p/FU]	[min/FU]	[%]	[%]	[%]	[kWh/FU]	[l/FU]	[min/FU]
	Structure - CIP concrete	0.1	0.75	1.54	1.38	0.004	47.3543			0	0.259554	0	6.55714
	Structure - HCS	0.1	0.75	1.54	1.38	0.004	47.3543	0.05	0.5	0	0.259554	0	6.55714
	Structure timber - Roof	0.1	0.01	0	0	0	4.13	0.05	0.15	0	0.257438	0	1.74396
	Board - MDF	0.15	0.13	0	0	0	7.55556	0.05	0.15	0	-	0	3.82
	Wall - Perforated clay brick (from cement mortar)	0.35	0.79	0	0	0	31.62	0.05	0.1	0.15	0	0	53.94
	Structure - Concrete block	0.6	1.59	40	0	0.008	31.73	0.05	0.1	0.18	0	0	41.5
	Structure - Hollow clay brick	0.52	1.59	40	0	0.008	31.73	0.05	0.1	0.18	0	0	41.5
	Wall - Faience tiles (from mortar)	0.07	0	0	0	0	20	0.05	0.1	0.05	0.36	0.75	12
	Wall - Faience tiles (from adhesive)	0.73	0	0	0	0	30	0.05	0.1	0.1	0.36	0.75	18
	Flooring - Ceramic tiles	0.33	0	0	0	0	13.33	0.05	0.1	0.025	0.36	0.75	12
	Flooring - Cement tiles	0.17	0	0	0	0	13.33	0.05	0.1	0.025	0.36	0.75	12
	Flooring - Concrete tiles	0.34	0	0	0	0	13.33	0.05	0.1	0.025	0.36	0.75	12
	Roof - Concrete rooftiles	0.45	0	0	0	0	16.31	0.05	0.05	0	0	0.75	6
	Window - Timber - Double	0.15	1.44	0	0	0	62.61	0.05	0.25	0	0.188	10	2.46
	Door - Interior door	0	0.72	0	0	0	20	0.05	0.25	0	0	0	0
	Lintel - Concrete - Reinforced	0.1	0.22	0.6	0	0.0016	22.5	0.05	0.1	0	0	0	5.76667
	Window sill - Blue limestone	0.1	0	0	0	0	10	0.05	0.1	0	*Sodium hydr.: 0.07	1.29485	5
											*Resources instead of energy

## Sheet: lbSN
	Material	Deconstruction						Construction		Cleaning
		ML	Energy	Water	Diesel	Saw. blade	Time	ML	Extra time	ML	Energy	Water	Time
		[%]	[kWh/FU]	[l/FU]	[kWh/FU]	[p/FU]	[min/FU]	[%]	[%]	[%]	[kWh/FU]	[l/FU]	[min/FU]
	Flooring - Concrete	0.7	0.75	1.54	1.38	0	38.26	-	-	0	0.259554	0	6.55714
	Structure timber - Roof	0.07	0.01	0	0	0	4.13	0.05	0.15	0	0.257438	0	1.74396
	Structure timber -Timber frame	0.07	0.01	0	0	0	2.45	0.05	0.15	0	0.257438	0	1.74396
	Board - Plywood	0.07	0.13	0	0	0	7.55556	0.05	0.15	0	-	0	3.82
	Board - OSB	0.07	0.13	0	0	0	7.55556	0.05	0.15	0	-	0	3.82
	Structure timber - Glulam	0.05	0.015	0	1.39	0	5.02	0.05	0.1	0	0.000114583	0
	Wall - Full clay brick (from cement mortar)	0.11	0.48	0	0	0	19.19	0.05	0.1	0.1	0	0	35.96
	Structure - Hollow clay brick	0.3	1.59	40	0	0.008	31.73	0.05	0.1	0.18	0	0	41.5
	Wall - Faience tiles (kitchen)	0.26	0	0	0	0	20	0.05	0.1	0.05	0.36	0.75	12
	Wall - Faience tiles (bathroom)	1	0	0	0	0	30	0.05	0.1	0.1	0.36	0.75	18
	Insulation - Resol	0.7	0.03	0	0	0	2.98	12,5%	0.1	0	0	0	0
	Insulation - Glasswool	0.1	0	0	0	0	3.59	0.05	0.15	0	0	0	0
	Insulation - PIR/PUR	0.1	0.03	0	0	0	2.98	12,5%	0.1	0	0	0	0
	Insulation - Cellulose	0.05	1.449	0	0	0	6.52	0.05	0.05	0	0	0	0
	Window – PVC - Double	0	1.44	0	0	0	62.61	0.05	0.25	0	0.188	10	2.46
	Window - Timber - Double	0	1.44	0	0	0	62.61	0.05	0.25	0	0.188	10	2.46
	Door - Interior door	0	0.72	0	0	0	20	0.05	0.25	0	0	0	0
	Lintel - Concrete - Reinforced	0.05	0.22	0.6	0	0.0016	22.5	0.05	0.1	0	0	0	5.76667

## Sheet: General
	Infrastructure
	Reuse scaling factor	[-]
	Ceramic factory	0.1
	Clay pit infrastructure	0.11
	Metal working factory	0.01
	Planing mill	0.18
	Stone wool factory	0.25
	Chemical factory	0.2
	Concrete mixing factory	0.15
	Share	[-]
	Clay bricks – Clay pit infrastructure	1e-10
	Ceramic tiles – Ceramic factory	4e-09
	Cement tiles – Clay pit infrastructure	1.67e-10
	Ceramic roof tiles – Clay pit infrastructure	2e-10
	Concrete roof tiles – Clay pit infrastructure	1.67e-10
	Timber components – Planing mill	1.04e-09
	PUR insulation – Chemical factory	4e-10
	Mineral wool insulation – Stone wool factory	4.43e-10
	Blue limestone – Clay pit infrastructure	1.84e-12
	Aluminum window – Metal working factory	4.58e-10
	PVC window – Metal working factory	7.66e-10
	Timber window – Metal working factory	4.57e-10
	Concrete – Concrete mixing factory	1.93e-10
	Packaging material
		Clay bricks (kg)	Tiles (m²)	Roof tiles (kg)	Timber flooring & sheet (m³)	Timber structure (m³)	Insulation (kg)	Blue limestone (p)	Windows (m²)	Concrete (m²)
	PP, granulate (kg)		0.02		0.07	0.07		0.01	2e-05
	Electricity (kWh)		0.02		0.02	0.02		0.01	0.02
	PE, low density (kg)	0.0005	0.0006				0.007			0.2
	Sheet rolling, chromium steel (kg)	2e-05
	Sheet rolling, steel (kg)	2e-05
	EURO pallet (p)	2e-05	0.001	2e-05	0.5		5e-05	0.0005	0.002
	PP crate (p)		0.004
	Metal cave (p)			7e-06
	Big bag (p)	0.0007	0.0007
	Timber slat (kg)				0.2	0.2			0.0006	0.2
	Screws (kg)								0.003
	Costs of resources and energy
		Unit	Cost (€)
	Gas	kWh	0.15
	Diesel	MJ	0.04
	Electricity	kWh	0.36
	Electricity	MJ	1.29
	Acetic acid	kg	0.6
	Nitric acid (salpeterzuur)	kg	0.4
	Sodium hydroxide	kg	0.5
	Soda Ash	kg	0.25
	Tap water	l	0.006
	Rain water	l	0
	Deionised water	l	5
	Sodium hypochloride (javel)	kg	3.2
	Sand	kg	0.48
	Sawing blade (replacement): medium size	m	0.83
	Sawing blade (replacement): large size	m	1.2
	Waste processing cost
		Cost (€/t)
	Gypsum board	45
	Hard plastics	125
	Roofing	200
	Glass waste	0
	Mixed residual waste	215
	Wood (B quality)	80
	Soil and stones	15
	Mixed rubble	8
	Storage area
		Storage approach	Scaling
	Insulation (EPS / glass wool)	Loose or pallets	5
	Wood (spruce, planks/beams)	Racks or stacked	9
	Wood sheets	Stacked	20
	Timber flooring	Stacked on pallet	20
	Bricks	Stacked on pallet	4.84
	Concrete products (prefabricated elements)	Stacked	2
	Windows	On racks vertically	4
	Tiles	Stacked on pallet	11.25
	Roof tiles	Cages	6.81
	Blue limestone sill & threshold	Stacked on pallet	12
