# Supplementary material
Source: Research Square preprint supplement (doi:10.21203/rs.3.rs-9645309/v1)
Supplement: Supplementary file 1 [file e295f0e702969407b24a07e7.docx]

**Supplemenatry material *Methods***

This part of the supplementary material provides some elaboration on the applied methodologies and inclusion of functional unit (FU), reuse impacts and costs. The data that is applied for the calculations can be found in the supplementary material *Data*.

1. **Functional unit**

The mass of material that is included in the FU for a donor building FUDonor or receiver building FUReceiver is calculated using equitation (1) and (2):

FUDonor = Ʃ (MMaterial,Donor - MMaterial,Donor,NoReuse ) * (1-fDecon) * (1-fClean) (1)

FUReceiver = Ʃ MMaterial,Receiver (2)

In these equitations, MMaterial,Donor and MMaterial,Receiver represent the total mass of respectively the donor and receiver building, MMaterial,Donor,NoReuse the mass of non-reusable materials in the donor building,fDecon andfClean the factor for material losses respectively during deconstruction and cleaning. The formulas are expressed in terms of mass, as this metric is widely adopted in the literature due to its objectivity, ease of measurement, status as a standard SI unit, comparability with European construction waste guidelines, and its central role in quantifying environmental impacts. Nevertheless, the formulas can equivalently be formulated using other metrics such as volume, linear, or surface area measurements.

1. **Life cycle inventory**

Environmental impacts of deconstruction (*EIDecon*) and processing (*EIProc*) are calculated using equitation (3) and (4):

*EIDecon = EIEner + EIResour + EIL,Decon  (3)*

*EIProc = EIEner + EIResour + EIInfra + EIPack + EIL,Proc  (4)*

In this equitation, *EIEner* represents the impact of the required energy, *EIResour* the impact of resources (e.g. water, chemicals, replacement of sawing blade etc.), *EIInfra* represents the impact of infrastructure, *EIPack* the impact of packaging materials, *EIL,Decon* and *EIL,Proc* the impact of waste processing material losses that occur during deconstruction and processing. All data on material losses, energy and resource use of deconstruction and processing are collected by: (i) measurements from on-site deconstruction tests, (ii) average values from stakeholder interviews and (iii) literature-based assumptions. Detailed inventories are provided in the supplementary material *Data*. Where possible, reuse processes are aligned with existing datasets for new materials or waste treatment. When logical for reuse, packaging practices are assumed comparable to those of new materials, while infrastructure inputs are adjusted to exclude heavy machinery and reflect the lower scale of reuse companies based on Bougrain[[1]](#footnote-1).

1. **Cost inventory**

The costs of deconstruction (C*Decon*) and processing (*Cproc*) are calculated using equitation (5) and (6):

*CDecon = CLabor + CEner + CReours + CTrans + CL,Decon  (5)*

*CProc = CLabor + CEner + CReour + CStor + CL,Proc (6)*

In this equitation, *CLabor* represents the cost of labor, *CEner* the cost of energy, *CResour* the cost of resources (e.g. water), *CTrans*  the cost to transfer the materials from the deconstruction site to the lorry for transportation, *CStor* represents the cost for storage, *CL,Decon* and *CL,Proc* the cost of the waste processing of material losses that occur during deconstruction and processing. The cost of labor is calculated by the labor rate for a specific process multiplied by the hourly cost of labor. Similar to the life cycle inventory, labor rates are collected through (i) measurements from on-site deconstruction tests, (ii) average values from stakeholder interviews and (iii) literature-based assumptions. Labor costs are calculated using an average Belgian hourly wage of €48[[2]](#footnote-2). Based on interviews and literature[[3]](#footnote-3),[[4]](#footnote-4), 18.5 % of demolition costs are attributed to deconstruction to account for material transfer costs. The costs of energy and resources are regular market costs in 2024 and are provided in the supplementary material. Storage costs are calculated based on required area (€4.5/m²/month for outdoor and €7.5/m²/month for indoor storage), assuming a six‑month storage period. Unlike the environmental assessment, the costs of packaging and infrastructure are not included due to missing data. Transport costs are estimated at €75 per hour, based on material mass or volume and an average lorry speed of 70 km/h. Construction costs for reused materials follow those of new materials, adjusted for additional labor based on the interviews: +30 % for insulation, +20 % for roof tiles and +10 % for all other materials.

1. F. D. Bougrain, Mathilde "Statistical analysis of the building elements reclamation trade in the Benelux, France, the UK and Ireland," 2022 [↑](#footnote-ref-1)
2. Eurostat. "EU hourly labour costs ranged from €11 to €55 in 2024." <https://ec.europa.eu/eurostat/web/products-eurostat-news/w/ddn-20250328-1> (accessed April, 30, 2026). [↑](#footnote-ref-2)
3. M. Arora, F. Raspall, L. Fearnley, and A. Silva, "Urban mining in buildings for a circular economy: Planning, process and feasibility prospects. Resources, Conservation and Recycling," 2021, doi: <https://doi.org/10.1016/j.resconrec.2021.105754>. [↑](#footnote-ref-3)
4. E. O'Brien, B. Guy, and A. S. Lindner, "Life cycle analysis of the deconstruction of military barracks: Ft. McClellan, Anniston, AL," Journal of Green Building, vol. 1, no. 4, pp. 166-183, 2006. [↑](#footnote-ref-4)
